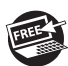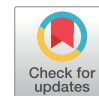

# Erratum

**Erratum. Fetal Macrosomia and Neonatal Hyperinsulinemic Hypoglycemia Associated With Transplacental Transfer of Sulfonylurea in a Mother With KCNJ11-Related Neonatal Diabetes. Diabetes Care 2014;37:3333–3335**

<https://doi.org/10.2337/dc19-er07>

*Nele Myngheer, Karel Allegaert, Andrew Hattersley, Tim McDonald, Holger Kramer, Frances M. Ashcroft, Johan Verhaeghe, Chantal Mathieu, and Kristina Casteels*

On page 3335 of the article cited above, funding information was added for author Frances M. Ashcroft. The following sentence was inserted at the end of the Funding section: “F.M.A. is supported by the European Research Council (grant 322620).”

The online version of the article (<https://doi.org/10.2337/dc14-1247>) has been corrected to reflect this change.
